# Supplementary material
Source: publisher figshare collection journal article supplement (https://acs.figshare.com/ndownloader/files/8630905)
Supplement: Supplementary file 1 [file 8630905]

## *Supporting Information*

### **Breathable microgel-colloidosome: Gas-switchable microcapsules with O<sub>2</sub> and CO<sub>2</sub> tunable shell permeability for hierarchical size-selective control-release**

*Lei Lei,<sup>1</sup> Qi Zhang,<sup>2</sup> Shuxian Shi,<sup>3,\*</sup> Shiping Zhu<sup>1,\*</sup>*

<sup>1</sup> Department of Chemical Engineering, McMaster University, Hamilton, Canada, L8S 4L7

<sup>2</sup> College of Chemical Engineering, Zhejiang University of Technology, Hangzhou 310014, China

<sup>3</sup> Key Laboratory of Carbon Fiber and Functional Polymers (Ministry of Education), Beijing University of Chemical Technology, Beijing 100029, China

\* Corresponding authors: Shiping Zhu at McMaster: [shipingzhu@mcmaster.ca](mailto:shipingzhu@mcmaster.ca); Shuxian Shi at BUCT: [shisx@mail.buct.edu.cn](mailto:shisx@mail.buct.edu.cn).

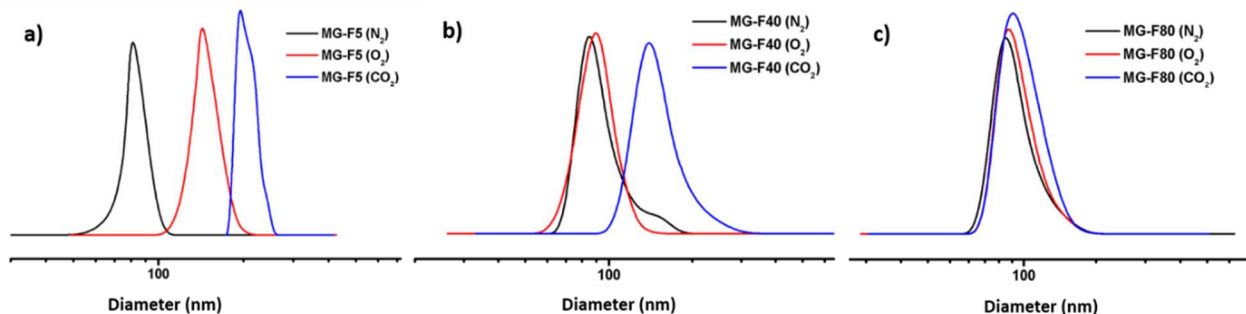

**Figure S1.** Dynamic light scattering (DLS) characterization of the gas ( $O_2$  and  $CO_2$ )-switchable hydrodynamic size for  $P(\text{DEA-co-FS})$  microgels with different FS content. a) MG-F5 (FS = 5 wt%), b) MG-F40 (FS = 40 wt%), c) MG-F80 (FS = 80 wt%).

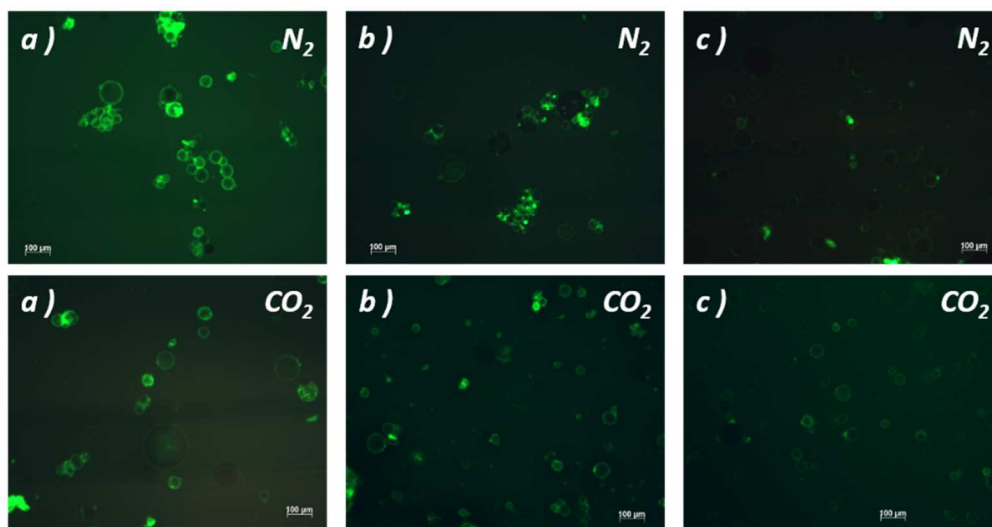

**Figure S2.** Fluorescence microscope images of the microgel-colloidosomes (MGC-F5) with 0.5, 1.0 and 2.0 wt% PPGDEG (based on microgel mass) for inter microgel (MG-MG) cross-linking: before ( $N_2$ ) and after  $CO_2$  treatment.

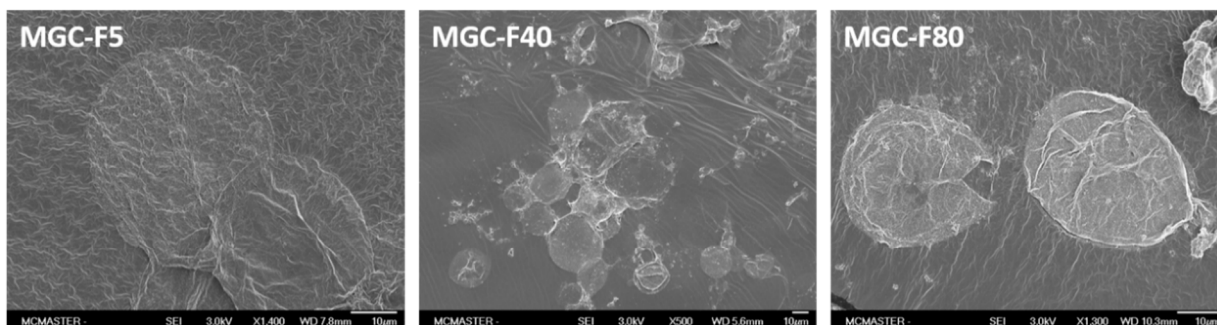

**Figure S3.** SEM image of MGC-F5, MGC-F40 and MGC-F80.
